# Supplementary material for: Treatment with maresin 1, a docosahexaenoic acid-derived pro-resolution lipid, protects skin from inflammation and oxidative stress caused by UVB irradiation
Source: PubMed Central journal article supplement (PMC6395735; doi:10.1038/s41598-019-39584-6), 2019-02-28
Supplement: 41598_2019_39584_MOESM1_ESM.pdf [file 41598_2019_39584_MOESM1_ESM.pdf]

# **Treatment with maresin 1, a docosahexaenoic acid-derived pro-resolution lipid, protects skin from inflammation and oxidative stress caused by UVB irradiation**

Talita L. C. Cezar<sup>1</sup>, Renata M. Martinez<sup>1</sup>, Camila da Rocha<sup>1</sup>, Cristina P. B. Melo<sup>1</sup>, David L. Vale<sup>1</sup>, Sergio M. Borghi<sup>2</sup>, Victor Fattori<sup>2</sup>, Josiane A. Vignoli<sup>3</sup>, Doumit Camilios-Neto<sup>3</sup>, Marcela M. Baracat<sup>1</sup>, Sandra R. Georgetti<sup>1</sup>, Waldiceu A. Verri, Jr<sup>2</sup>, Rúbia Casagrande<sup>1\*</sup>

<sup>1</sup>Laboratory of Oxidative Stress and Inflammation, Department of Pharmaceutical Sciences, Londrina State University, Londrina, PR, Brazil.

<sup>2</sup>Laboratory of Pain, Inflammation, Neuropathy, and Cancer, Department of Pathology, Londrina State University, Londrina, PR, Brazil.

<sup>3</sup>Department of Biochemistry and Biotechnology, Londrina State University, Londrina, PR, Brazil.

\*Corresponding author. Adress: Avenida Robert Koch, 60, Vila Operária, CEP 86039-440 Londrina, Paraná, Brazil. Tel.: +55 43 33712475. E-mail address: [rubiaca@yaho.com.br](mailto:rubiaca@yaho.com.br) (R. Casagrande).

## Supplementary figure S1

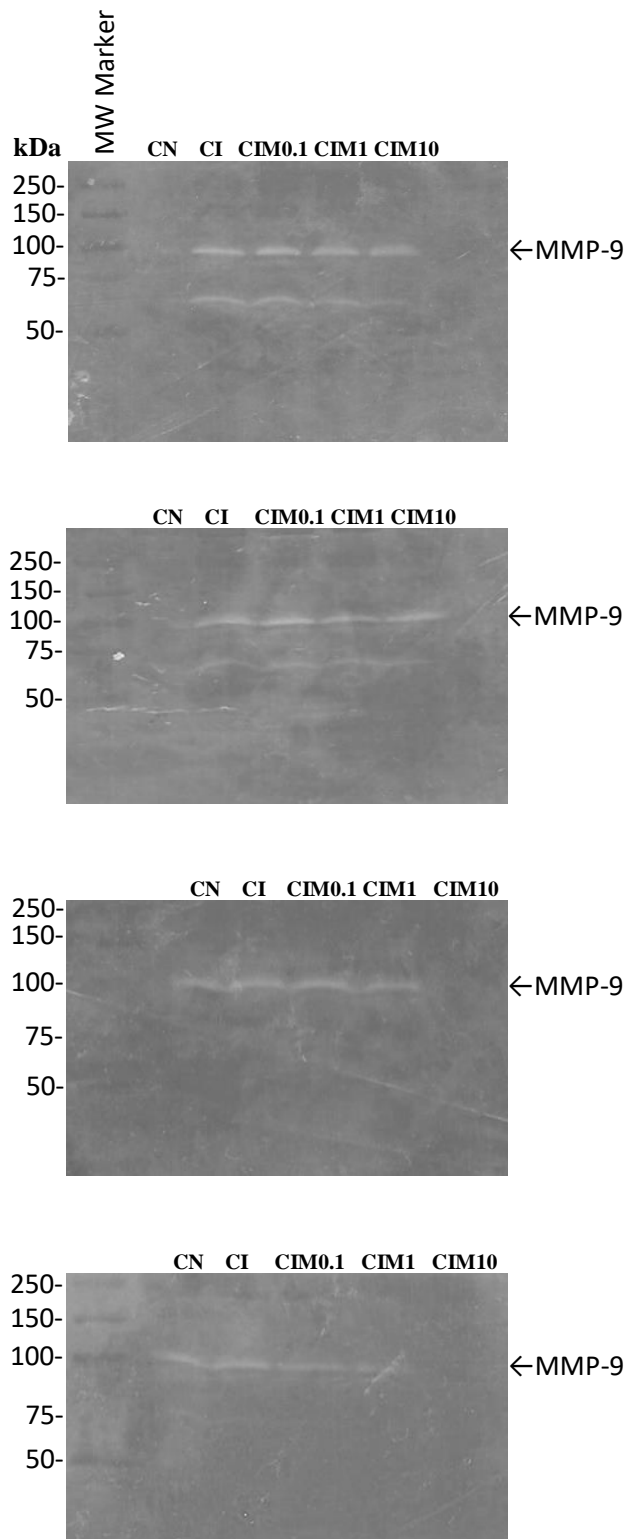

**Supplementary Figure S1.** Uncropped full-length gel membranes of gelatin zymography from which the representative image shown in figure 5 in the main manuscript was cropped. Each sample is a pool of the dorsal skin of 6 hairless mice. CNI=control non-irradiated; CI=control irradiated treated with vehicle; CIM0.1=control

irradiated treated with 0.1 ng of MaR1; CIM1=control irradiated treated with 1 ng of MaR1;and CIM10=control irradiated treated with 10 ng of MaR1.
